# Supplementary material
Source: publisher site journal article supplement (https://www.dovepress.com/article/437944)
Supplement: Supplementary file 1 [file get_supplementary_file.php]

**Supplementary Table 1.** Definition of autoimmune disease and nephrotic syndrome

| <b>Disease</b>     | <b>ICD-10 code</b>                                                                                                                                                                                                                        |
|--------------------|-------------------------------------------------------------------------------------------------------------------------------------------------------------------------------------------------------------------------------------------|
| Autoimmune disease | D51.0, D59.1, D69.3, E05.0, E06.3, E10, E27.1, G35, G61.0, H20, K50-K51, K73, K74.3, K90.0, L10, L12, L40 (excluding L40.4), L63, L80.9, M05-M06, M08, M30.1, M31.3, M33, M31.5-M31.6, M35.3, G70.0, M34, M32.1, M32.9, M35.0, M45.9 (13) |
| Nephrotic syndrome | N04                                                                                                                                                                                                                                       |

ICD-10, International Classification of Diseases, 10th revision.

**Supplementary Table 2.** Patient demographics and characteristics

|                                                                       | Full analysis population<br>(N=2135) | Physician-referred<br>(n=420) | Physician-referred frequent exacerbators<br>(n=148) | Self-referred<br>(n=1715) |
|-----------------------------------------------------------------------|--------------------------------------|-------------------------------|-----------------------------------------------------|---------------------------|
| Sex                                                                   |                                      |                               |                                                     |                           |
| Female                                                                | 1233 (57.8)                          | 226 (53.8)                    | 80 (54.1)                                           | 1007 (58.7)               |
| Age (years) <sup>a</sup>                                              | 46.0 [11.8]                          | 47.8 [12.4]                   | 47.0 [11.8]                                         | 45.6 [11.6]               |
| ≥40 years                                                             | 1513 (70.9)                          | 312 (74.3)                    | 111 (75.0)                                          | 1201 (70.0)               |
| Comorbidity <sup>b</sup>                                              |                                      |                               |                                                     |                           |
| Quan–Charlson comorbidity index score                                 | 2.5 [2.1]                            | 3.0 [2.3]                     | 2.9 [2.1]                                           | 2.4 [2.1]                 |
| Allergic rhinitis                                                     | 1684 (78.9)                          | 333 (79.3)                    | 127 (85.8)                                          | 1351 (78.8)               |
| Respiratory infection                                                 | 1137 (53.3)                          | 255 (60.7)                    | 94 (63.5)                                           | 882 (51.4)                |
| Pneumonia                                                             | 724 (33.9)                           | 197 (46.9)                    | 66 (44.6)                                           | 527 (30.7)                |
| Gastroesophageal reflux disease                                       | 622 (29.1)                           | 148 (35.2)                    | 70 (47.3)                                           | 474 (27.6)                |
| Chronic paranasal sinusitis                                           | 596 (27.9)                           | 125 (29.8)                    | 66 (44.6)                                           | 471 (27.5)                |
| Diabetes mellitus                                                     | 585 (27.4)                           | 143 (34.1)                    | 49 (33.1)                                           | 442 (25.8)                |
| COPD                                                                  | 510 (23.9)                           | 129 (30.7)                    | 47 (31.8)                                           | 381 (22.2)                |
| Psychiatric disorder (depression, anxiety)                            | 417 (19.5)                           | 86 (20.5)                     | 43 (29.1)                                           | 331 (19.3)                |
| Sleep apnea                                                           | 373 (17.5)                           | 85 (20.2)                     | 35 (23.7)                                           | 288 (16.8)                |
| Cardiovascular disease (myocardial infarction, stroke, heart failure) | 328 (15.4)                           | 100 (23.8)                    | 31 (21.0)                                           | 228 (13.3)                |
| Atopic dermatitis                                                     | 200 (9.4)                            | 29 (6.9)                      | 8 (5.4)                                             | 171 (10.0)                |
| Osteoporosis                                                          | 81 (3.8)                             | 23 (5.5)                      | 10 (6.8)                                            | 58 (3.4)                  |

Data are n (%) or mean [standard deviation].

COPD, chronic obstructive pulmonary disease.

<sup>a</sup> Age at index date.

<sup>b</sup> Comorbidities before or on the index date. The counts duplicated among comorbidities.

**Supplementary Table 3.** Number of asthma exacerbations before and after referral to specialist in the physician-referred population

|                                 | Physician-referred (n=420) |                | P-value <sup>a</sup> |
|---------------------------------|----------------------------|----------------|----------------------|
|                                 | Baseline period            | Outcome period |                      |
| Asthma exacerbation (composite) |                            |                | 0.012                |
| 0 events                        | 209 (49.8)                 | 263 (62.6)     |                      |
| 1 event                         | 112 (26.7)                 | 73 (17.4)      |                      |
| 2 events                        | 40 (9.5)                   | 30 (7.1)       |                      |
| 3 events                        | 19 (4.5)                   | 16 (3.8)       |                      |
| ≥4 events                       | 40 (9.5)                   | 38 (9.1)       |                      |
| Asthma-related hospitalization  |                            |                | 0.459                |
| 0 events                        | 385 (91.7)                 | 392 (93.3)     |                      |
| 1 event                         | 34 (8.1)                   | 26 (6.2)       |                      |
| 2 events                        | 1 (0.2)                    | 2 (0.5)        |                      |
| 3 events                        | 0                          | 0              |                      |
| ≥4 events                       | 0                          | 0              |                      |
| Injectable steroid use          |                            |                | 0.074                |
| 0 events                        | 272 (64.8)                 | 308 (73.3)     |                      |
| 1 event                         | 79 (18.8)                  | 57 (13.6)      |                      |
| 2 events                        | 30 (7.1)                   | 17 (4.1)       |                      |
| 3 events                        | 13 (3.1)                   | 13 (3.1)       |                      |
| ≥4 events                       | 26 (6.2)                   | 25 (6.0)       |                      |
| Oral corticosteroid burst       |                            |                | 0.800                |
| 0 events                        | 315 (75.0)                 | 330 (78.6)     |                      |
| 1 event                         | 71 (16.9)                  | 46 (11.0)      |                      |
| 2 events                        | 17 (4.1)                   | 25 (6.0)       |                      |
| 3 events                        | 7 (1.7)                    | 9 (2.1)        |                      |
| ≥4 events                       | 10 (2.4)                   | 10 (2.4)       |                      |

Data are n (%).

<sup>a</sup> Two-sided P-value of Wilcoxon signed-rank test.

**Supplementary Table 4.** Numbers of asthma patients with an exacerbation before and after referral to a specialist in physician-referred patients with  $\geq 2$  asthma exacerbations

|                                 | Physician-referred frequent exacerbators<br>(n=148) |                |
|---------------------------------|-----------------------------------------------------|----------------|
|                                 | Baseline period                                     | Outcome period |
| Asthma exacerbation (composite) | 148 (100.0)                                         | 88 (59.5)      |
| Asthma-related hospitalization  | 26 (17.6)                                           | 17 (11.5)      |
| Injectable steroid use          | 125 (84.5)                                          | 73 (49.3)      |
| Oral corticosteroid burst       | 75 (50.7)                                           | 53 (35.8)      |

Data are n (%).

**Supplementary Table 5.** Numbers of asthma patients with an exacerbation before and after referral to a specialist in self-referred patients

|                                 | Self-referred patients (n=1715) |                |
|---------------------------------|---------------------------------|----------------|
|                                 | Baseline period                 | Outcome period |
| Asthma exacerbation (composite) | 709 (41.3)                      | 521 (30.4)     |
| Asthma-related hospitalization  | 68 (4.0)                        | 59 (3.4)       |
| Injectable steroid use          | 511 (29.8)                      | 389 (22.7)     |
| Oral corticosteroid burst       | 344 (20.1)                      | 257 (15.0)     |

Data are n (%).

**Supplementary Table 6.** Prescriptions of asthma medication before and after referral to a specialist in physician-referred patients with  $\geq 2$  asthma exacerbations

|                      | Physician-referred frequent exacerbators (n=148) |                |
|----------------------|--------------------------------------------------|----------------|
|                      | Baseline period                                  | Outcome period |
| Drug for asthma      |                                                  |                |
| SABA                 | 85 (57.4)                                        | 60 (40.5)      |
| ICS alone            | 34 (23.0)                                        | 25 (16.9)      |
| LABA                 | 40 (27.0)                                        | 17 (11.5)      |
| LAMA                 | 22 (14.9)                                        | 33 (22.3)      |
| ICS/LABA             | 138 (93.2)                                       | 128 (86.5)     |
| ICS/LABA/LAMA        | 0                                                | 2 (1.4)        |
| OCS                  | 104 (70.3)                                       | 72 (48.7)      |
| LTRA                 | 127 (85.8)                                       | 120 (81.1)     |
| Theophylline         | 83 (56.1)                                        | 54 (36.5)      |
| Biologics            | 2 (1.4)                                          | 4 (2.7)        |
| OCS prescription     |                                                  |                |
| Maintenance OCS      | 6 (4.1)                                          | 8 (5.4)        |
| Any ICS prescription |                                                  |                |
| High dose            | 94 (63.5)                                        | 77 (52.0)      |
| Middle dose          | 37 (25.0)                                        | 34 (23.0)      |
| Low dose             | 17 (11.5)                                        | 24 (16.2)      |

Data are n (%).

ICS, inhaled corticosteroid; LABA, long-acting beta-agonist; LAMA, long-acting muscarinic antagonist; LTRA, LT receptor antagonist; OCS, oral corticosteroid; SABA, short-acting beta-agonist.

**Supplementary Table 7.** Prescription of asthma medication before and after referral to a specialist in self-referred patients

|                      | Self-referred (n=1715) |                |
|----------------------|------------------------|----------------|
|                      | Baseline period        | Outcome period |
| Drug for asthma      |                        |                |
| SABA                 | 757 (44.1)             | 510 (29.7)     |
| ICS alone            | 393 (22.9)             | 289 (16.9)     |
| LABA                 | 351 (20.5)             | 187 (10.9)     |
| LAMA                 | 82 (4.8)               | 120 (7.0)      |
| ICS/LABA             | 1581 (92.2)            | 1425 (83.1)    |
| ICS/LABA/LAMA        | 3 (0.2)                | 12 (0.7)       |
| OCS                  | 610 (35.6)             | 497 (29.0)     |
| LTRA                 | 1237 (72.1)            | 1092 (63.7)    |
| Theophylline         | 592 (34.5)             | 435 (25.4)     |
| Biologics            | 4 (0.2)                | 9 (0.5)        |
| OCS prescription     |                        |                |
| Maintenance OCS      | 12 (0.7)               | 26 (1.5)       |
| Any ICS prescription |                        |                |
| High dose            | 824 (48.1)             | 628 (36.6)     |
| Middle dose          | 534 (31.1)             | 484 (28.2)     |
| Low dose             | 356 (20.8)             | 382 (22.3)     |

Data are n (%).

ICS, inhaled corticosteroid; LABA, long-acting beta-agonist; LAMA, long-acting muscarinic antagonist; LTRA, LT receptor antagonist; OCS, oral corticosteroid; SABA, short-acting beta-agonist.

**Supplementary Table 8.** Laboratory tests and medical procedures before and after referral to a specialist in physician-referred patients with  $\geq 2$  asthma exacerbations

|                    | Physician-referred frequent exacerbators (n=148) |                |
|--------------------|--------------------------------------------------|----------------|
|                    | Baseline period                                  | Outcome period |
| Spirometry         | 38 (25.7)                                        | 71 (48.0)      |
| Spirometry         |                                                  |                |
| 0                  | 110 (74.3)                                       | 77 (52.0)      |
| 1                  | 4 (2.7)                                          | 1 (0.7)        |
| 2                  | 23 (15.5)                                        | 42 (28.4)      |
| 3                  | 1 (0.7)                                          | 6 (4.1)        |
| $\geq 4$           | 10 (6.8)                                         | 22 (14.9)      |
| Eosinophil count   | 77 (52.0)                                        | 91 (61.5)      |
| Total IgE          | 34 (23.0)                                        | 64 (43.2)      |
| RAST               | 29 (19.6)                                        | 49 (33.1)      |
| FeNO               | 19 (12.8)                                        | 66 (44.6)      |
| C-reactive protein | 85 (57.4)                                        | 105 (71.0)     |

Data are n (%).

FeNO, fractional exhaled nitric oxide; IgE, immunoglobulin E; RAST, radioallergosorbent test.



**Supplementary Table 9.** Laboratory tests and medical procedures before and after referral in asthma patients self-referred to a specialist

|                    | Self-referred (n=1715) |                |
|--------------------|------------------------|----------------|
|                    | Baseline period        | Outcome period |
| Spirometry         | 340 (19.8)             | 622 (36.3)     |
| Spirometry         |                        |                |
| 0                  | 1375 (80.2)            | 1093 (63.7)    |
| 1                  | 26 (1.5)               | 44 (2.6)       |
| 2                  | 193 (11.3)             | 352 (20.5)     |
| 3                  | 8 (0.5)                | 33 (1.9)       |
| ≥4                 | 113 (6.6)              | 193 (11.3)     |
| Eosinophil count   | 541 (31.6)             | 698 (40.7)     |
| Total IgE          | 203 (11.8)             | 365 (21.3)     |
| RAST               | 162 (9.5)              | 300 (17.5)     |
| FeNO               | 165 (9.6)              | 566 (33.0)     |
| C-reactive protein | 582 (33.9)             | 792 (46.2)     |

Data are n (%).

FeNO, fractional exhaled nitric oxide; IgE, immunoglobulin E; RAST, radioallergosorbent test.

**Supplementary Table 10.** Proportions of reverse referrals in asthma patients by subpopulation

|                                   | Physician-referred<br>(n=420) | Physician-referred frequent<br>exacerbators (n=148) | Self-referred<br>(n=1715)  |
|-----------------------------------|-------------------------------|-----------------------------------------------------|----------------------------|
| Reverse referral, n/N, % (95% CI) |                               |                                                     |                            |
| Overall                           | 264/420, 62.9 (58.0–67.5)     | 82/148, 55.4 (47.0–63.6)                            | 677/1715, 39.5 (37.2–41.8) |
| DPC hospital                      | 219/326, 67.2 (61.8–72.3)     | 65/110, 59.1 (49.3–68.4)                            | 396/742, 53.4 (49.7–57.0)  |
| Non-DPC hospital                  | 45/94, 47.9 (37.5–58.4)       | 17/38, 44.7 (28.6–61.7)                             | 281/973, 28.9 (26.1–31.8)  |
| Bed size, <20 beds                | 19/54, 35.2 (22.7–49.4)       | 8/25, 32.0 (15.0–53.5)                              | 205/763, 26.9 (23.8–30.2)  |
| Bed size, ≥20 beds                | 243/361, 67.3 (62.2–72.1)     | 73/120, 60.8 (51.5–69.6)                            | 460/871, 52.8 (49.4–56.2)  |

DPC, diagnosis procedure combination.
